# Supplementary material
Source: PubMed Central journal article supplement (PMC9670863)

## Supplementary Material

**Table S1** Reasons for patient DOs as reported in the opioid clinical trials

| Reasons     | Placebo                                   | Oxycodone                                 | Oxymorphone                               | Tramadol                                  |
|-------------|-------------------------------------------|-------------------------------------------|-------------------------------------------|-------------------------------------------|
|             | N <sub>total</sub> , N <sub>DOs</sub> (%) |
| <b>AEs</b>  | 2078, 121 (5.82)                          | 1174, 315 (26.8)                          | 674, 274 (40.7)                           | 3175, 596 (18.8)                          |
| <b>LoE</b>  | 1959, 419 (21.4)                          | 999, 79 (7.91)                            | 674, 42 (6.23)                            | 2814, 321 (11.4)                          |
| <b>TDOs</b> | 2283, 752 (32.9)                          | 1174, 457 (38.7)                          | 674, 333 (49.4)                           | 3990, 1494 (37.5)                         |

N<sub>total</sub>: the total number of patients involved in the clinical trials.

N<sub>DOs</sub>: the total number of patients left (dropped out) the clinical trials.

?: the percentage of DOs.

**Table S2** List of tested models with their OF values for primary efficacy endpoint analysis

| <b>Model #</b> | <b>Models</b>                                                                                          | <b>OF values</b> | <b>ΔOF</b> |
|----------------|--------------------------------------------------------------------------------------------------------|------------------|------------|
| 1              | Sigmoidal E <sub>max</sub> model with proportional residual Error                                      | 212.103          | -          |
| 2              | Model #1 with adding proportional interindividual variability of E <sub>max</sub> and ED <sub>50</sub> | 212.103          | 0          |
| 3              | Model #1 with adding proportional interindividual variability of PLC                                   | 203.913          | -8.19      |
| 4              | Model #3 with adding additive interindividual variability of PLC instead of proportional               | 203.204          | -0.709     |
| 5              | Model #3 with $\sqrt{N}$                                                                               | 237.000          | 33.087     |
| 6              | Model #3 with adding additive residual Error instead of proportional                                   | 202.049          | -1.864     |
| 7              | Model #3 with combined both additive and proportional residual Error                                   | 202.049          | -1.864     |

N = number of patients.

**Table S3** List of tested models with their OF values for efficacy-time course analysis

| <b>Model #</b> | <b>Models</b>                                                                                          | <b>OF values</b> | <b>ΔOF</b> |
|----------------|--------------------------------------------------------------------------------------------------------|------------------|------------|
| 1              | Basic model with proportional residual Error                                                           | 531.558          | -          |
| 2              | Model #1 with adding proportional interindividual variability of PLC                                   | 448.427          | -83.131    |
| 3              | Model #2 with adding proportional interindividual variability of PLC <sub>50</sub>                     | 432.990          | -15.437    |
| 4              | Model #3 with adding proportional interindividual variability of E <sub>max</sub> and ED <sub>50</sub> | 446.187          | 13.197     |
| 5              | Model #3 with $\sqrt{N}$                                                                               | 888.612          | 455.622    |
| 6              | Model #3 with adding additive residual Error instead of proportional                                   | 446.076          | 12.086     |
| 7              | Model #3 with combined both additive and proportional residual Error                                   | 432.991          | 0.001      |

N = number of patients.

**Table S4** Estimated parameters of efficacy-time course analysis

| <b>Parameter</b>                         | <b>Value</b> | <b>%RSE</b> | <b>95% CI</b>     |
|------------------------------------------|--------------|-------------|-------------------|
| <b>E<sub>max</sub>(mm)</b>               | -31.7        | 48.0        | (-43.4, -19.3)    |
| <b>PLC (mm)</b>                          | -22.3        | 8.07        | (-25.8, -18.8)    |
| <b>PLC<sub>50</sub> (week)</b>           | 1.47         | 25.7        | (0.729, 2.21)     |
| <b>ω<sup>2</sup> of PLC</b>              | 0.0176       | 54.9        | (-0.0013, 0.0366) |
| <b>ω<sup>2</sup> of PLC<sub>50</sub></b> | 0.982        | 42.0        | (0.174, 1.79)     |
| <b>σ<sup>2</sup></b>                     | 0.0225       | 26.4        | (0.0109, 0.0341)  |

%RSE = relative standard error.

95% CI = 95% confidence interval estimated by PDx-Pop<sup>®</sup>.

**Table S5** List of tested models with their OF values for Safety analysis

**a) Gastrointestinal system**

| Model # | Models                         | Gastrointestinal |             |          |             |          |             |
|---------|--------------------------------|------------------|-------------|----------|-------------|----------|-------------|
|         |                                | constipation     | $\Delta$ OF | Nausea   | $\Delta$ OF | vomiting | $\Delta$ OF |
| 1       | Basic model                    | 7237.132         | -           | 8221.171 | -           | 4476.468 | -           |
| 2       | Model #1 + $\eta$ of intercept | 7044.276         | -192.856    | 7919.521 | -301.65     | 4347.7   | -128.768    |
| 3       | Model #2 + $\eta$ of slope     | 7044.277         | 0.001       | 7909.961 | -9.56       | 4333.079 | -14.621     |

**b) Central nervous system**

| Model # | Models                         | Central nervous |             |          |             |            |             |
|---------|--------------------------------|-----------------|-------------|----------|-------------|------------|-------------|
|         |                                | Dizziness       | $\Delta$ OF | headache | $\Delta$ OF | Somnolence | $\Delta$ OF |
| 1       | Basic model                    | 6151.785        | -           | 4621.389 | -           | 5026.156   | -           |
| 2       | Model #1 + $\eta$ of intercept | 6034.619        | -117.166    | 4509.463 | -111.926    | 4831.77    | -194.386    |
| 3       | Model #2 + $\eta$ of slope     | 6033.195        | -1.424      | 4497.848 | -11.615     | 4831.176   | -0.594      |

**c) Locomotor, respiratory, and integumentary systems**

| Model # | Models                         | Locomotor |             | Respiratory |             | Integumentary |             |
|---------|--------------------------------|-----------|-------------|-------------|-------------|---------------|-------------|
|         |                                | Fatigue   | $\Delta$ OF | Xerostomia  | $\Delta$ OF | Pruritus      | $\Delta$ OF |
| 1       | Basic model                    | 1773.264  | -           | 2224.401    | -           | 3244.812      | -           |
| 2       | Model #1 + $\eta$ of intercept | 1771.862  | -1.402      | 2124.902    | -99.499     | 3195.039      | -49.773     |
| 3       | Model #2 + $\eta$ of slope     | 1771.352  | -0.51       | 2124.903    | 0.001       | 3195.041      | 0.002       |

**Table S6** List of tested models with their OF values for tolerability analysis

| <b>Model #</b> | <b>Models</b>                                    | <b>AEs</b> | <b>ΔOF</b> | <b>LoE</b> | <b>ΔOF</b> |
|----------------|--------------------------------------------------|------------|------------|------------|------------|
| <b>1</b>       | <b>Basic model</b>                               | 9172.11    | -          | 4874.99    | -          |
| <b>2</b>       | <b>Model #1 + <math>\eta</math> of intercept</b> | 9094.207   | -77.903    | 4598.854   | -267.136   |
| <b>3</b>       | <b>Model #2 + <math>\eta</math> of slope</b>     | 9128.149   | 33.942     | 4595.126   | -3.728     |

**Table S7** Estimated model parameters of tolerability analysis

| DO reason     | Intercept    | $\omega^2$ of intercept | Slope               |                     |                      |
|---------------|--------------|-------------------------|---------------------|---------------------|----------------------|
|               |              |                         | Oxycodone           | Oxymorphone         | Tramadol             |
| <b>AEs</b>    | 6.84         | 0.0241                  | 0.0399              | 0.0328              | 0.00445              |
| <b>%RSE</b>   | 4.78%        | 27.1%                   | 10.4%               | 14.5%               | 14.1%                |
| <b>95% CI</b> | (5.43, 8.58) | (0.0113, 0.0369)        | (0.0317, 0.0481)    | (0.0235, 0.0421)    | (0.00322, 0.00568)   |
| <b>LoE</b>    | 11.7         | 0.705                   | -0.0319             | -0.0226             | -0.00487             |
| <b>%RSE</b>   | 26.4%        | 50.1%                   | 20.4%               | 45.1%               | 17.5%                |
| <b>95% CI</b> | (4.41, 27.3) | (0.0131, 1.40)          | (-0.04477, -0.0191) | (-0.0426, -0.00261) | (-0.00654, -0.00320) |

%RSE = relative standard error.

95% CI = 95% confidence interval estimated by PDx-Pop<sup>®</sup>.

**Table S8** Summary of predicted dropout rates at drug recommended dose range

| <b>DO reason</b> | <b>Oxycodone</b>     |                              | <b>Oxymorphone</b>  |                              | <b>Tramadol</b>       |                             |
|------------------|----------------------|------------------------------|---------------------|------------------------------|-----------------------|-----------------------------|
|                  | <b>20–160 mg/day</b> | <b>ED<sub>50</sub>(47.0)</b> | <b>10–80 mg/day</b> | <b>ED<sub>50</sub>(83.9)</b> | <b>100–300 mg/day</b> | <b>ED<sub>50</sub>(247)</b> |
| <b>AEs</b>       | 14.0 – 97.8 %        | 32.3 %                       | 9.24–50.3%          | 53.5 %                       | 10.3–21.8 %           | 18.1%                       |
| <b>LoE</b>       | 6.53 – 0.0800 %      | 2.87 %                       | 9.54–2.12%          | 1.94 %                       | 7.51–2.97 %           | 3.81%                       |



Fig. S1 Flowchart of the study selection process

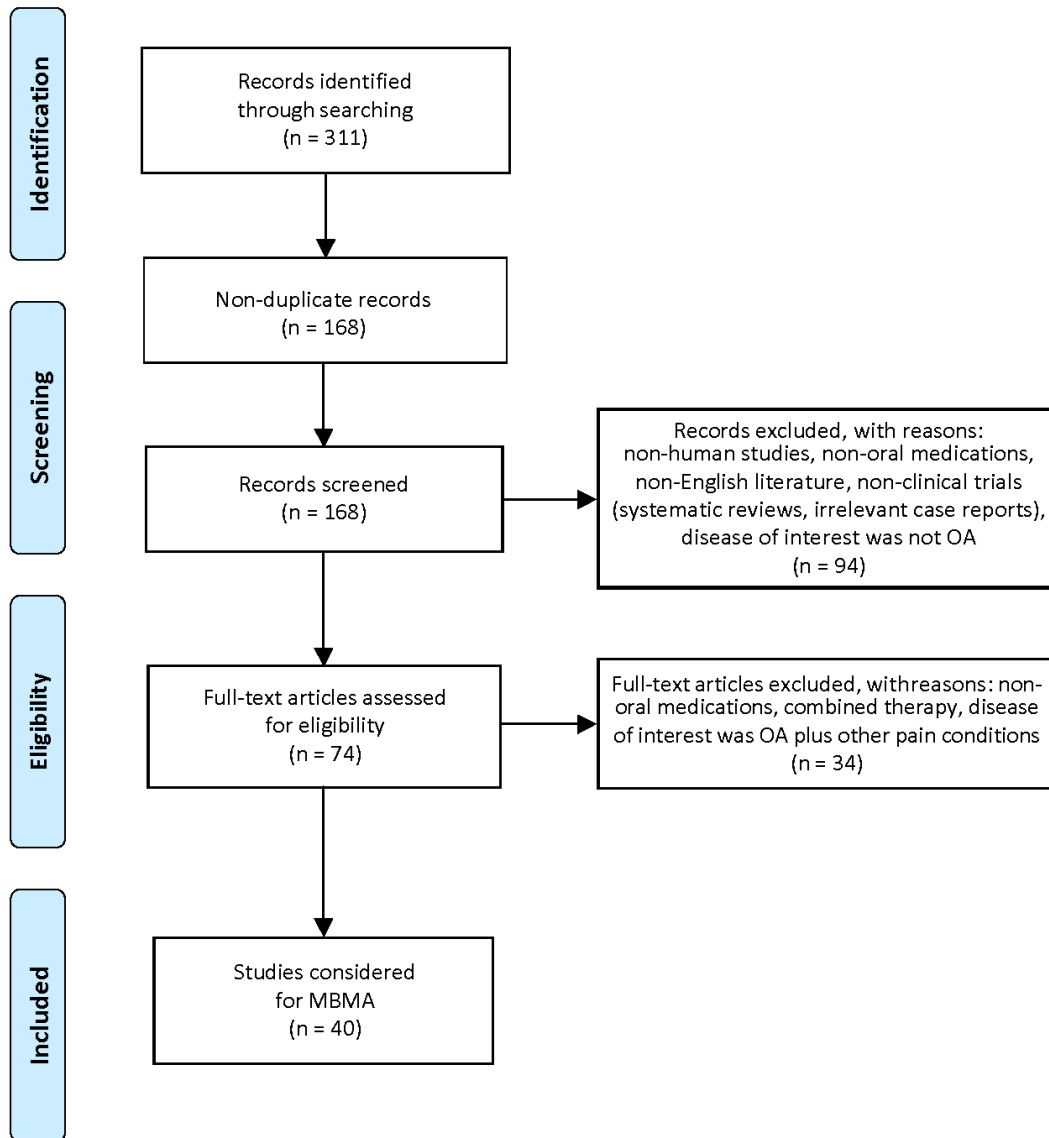

**Fig. S2** A schematic drawing of a network diagram for the treatments included in the MBMA. (a) Primary efficacy endpoint analysis; (b) Safety analysis. Each treatment is represented by a node. When direct trial evidence exists, treatments are joined by a line where the width of the line is proportional to number of comparisons. The figures on each line indicate the number of treatment arms for each comparison while n refers to the total number of clinical studies involved in the MBMA

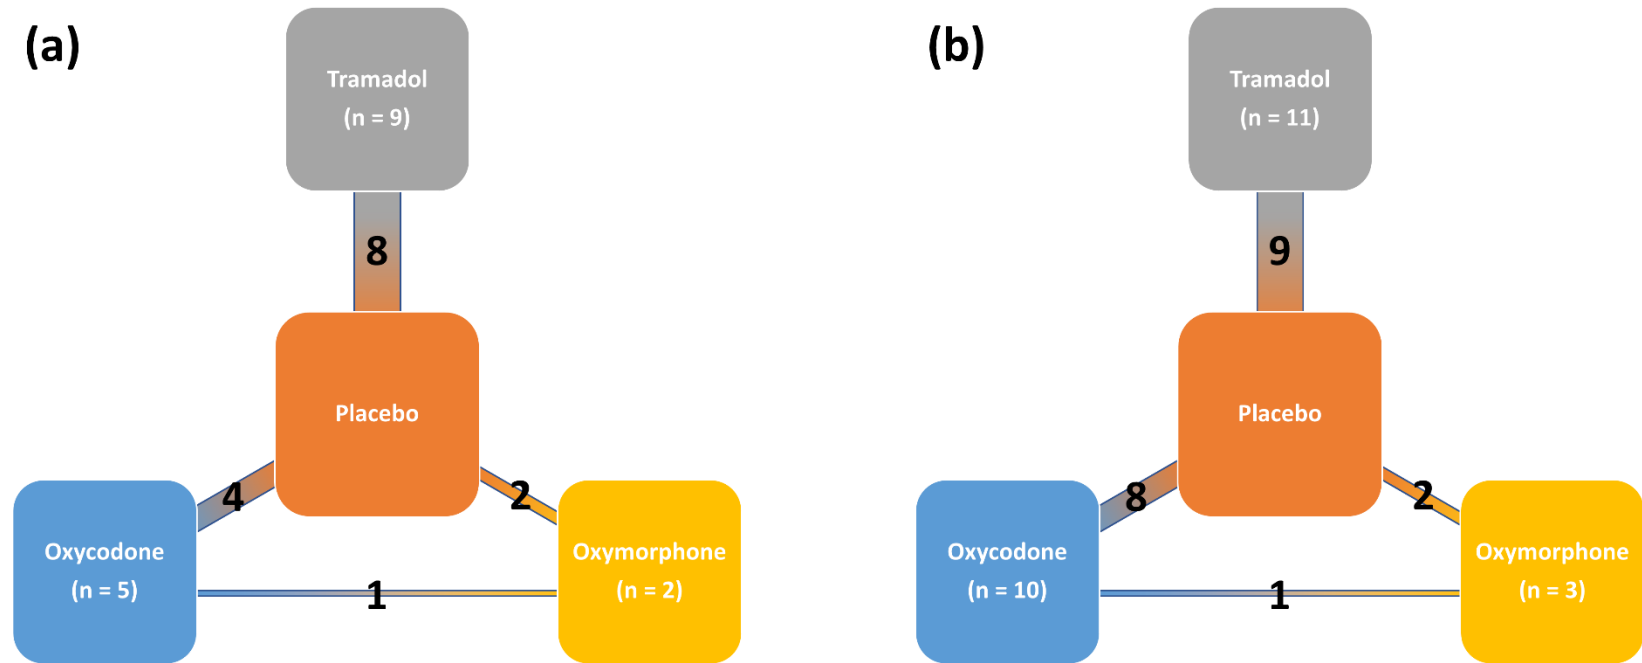

**Fig. S3** Visual goodness-of-fit plots of the selected model for primary efficacy endpoint analysis

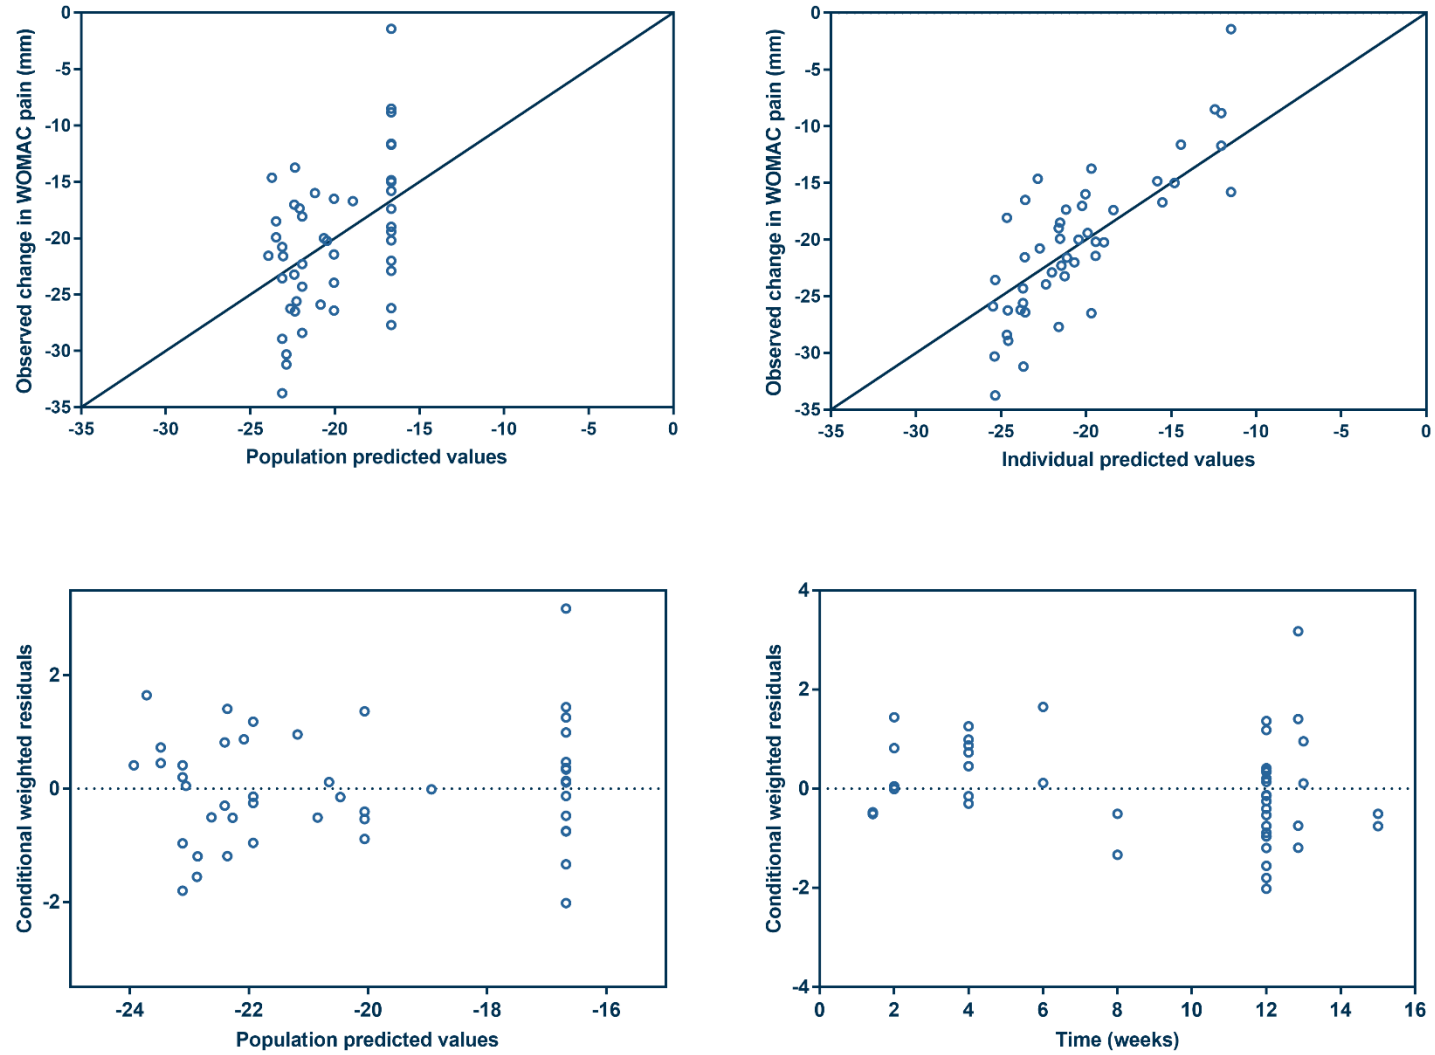

Fig. S4 Visual goodness-of-fit plots of the selected model for efficacy-time course analysis

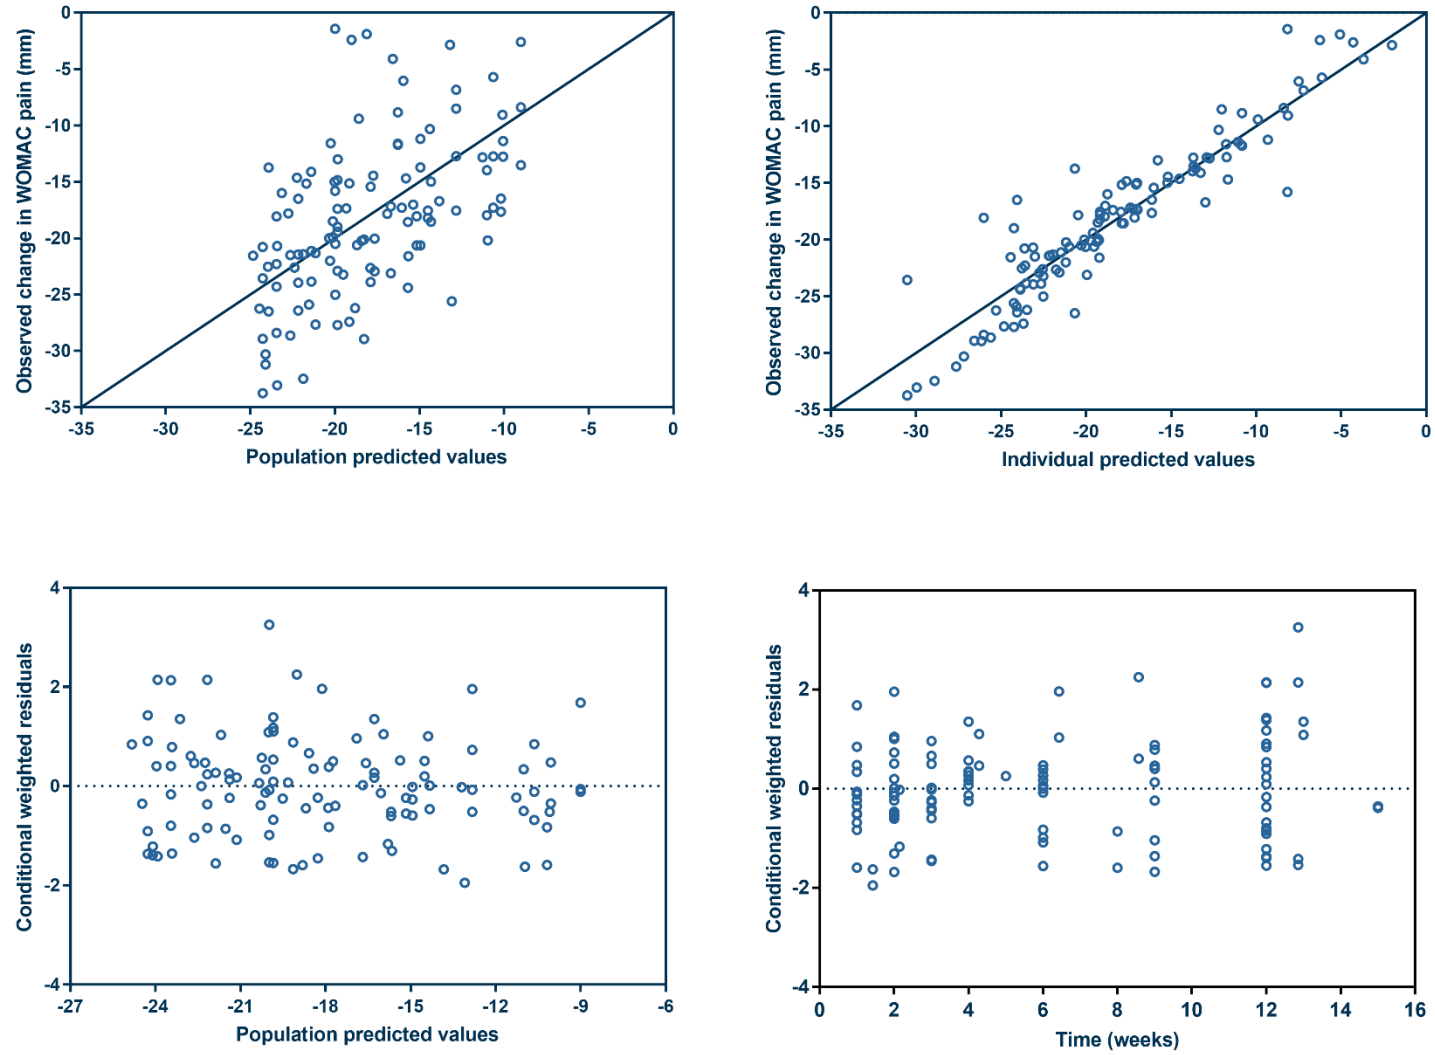

**Fig. S5** Efficacy-time course analysis of tested doses in the clinical trials. Symbols represent the observed data over time course whilst the solid curves represent the fit at given doses (using population predicted values). PLC<sub>50</sub> is represented by the dashed line

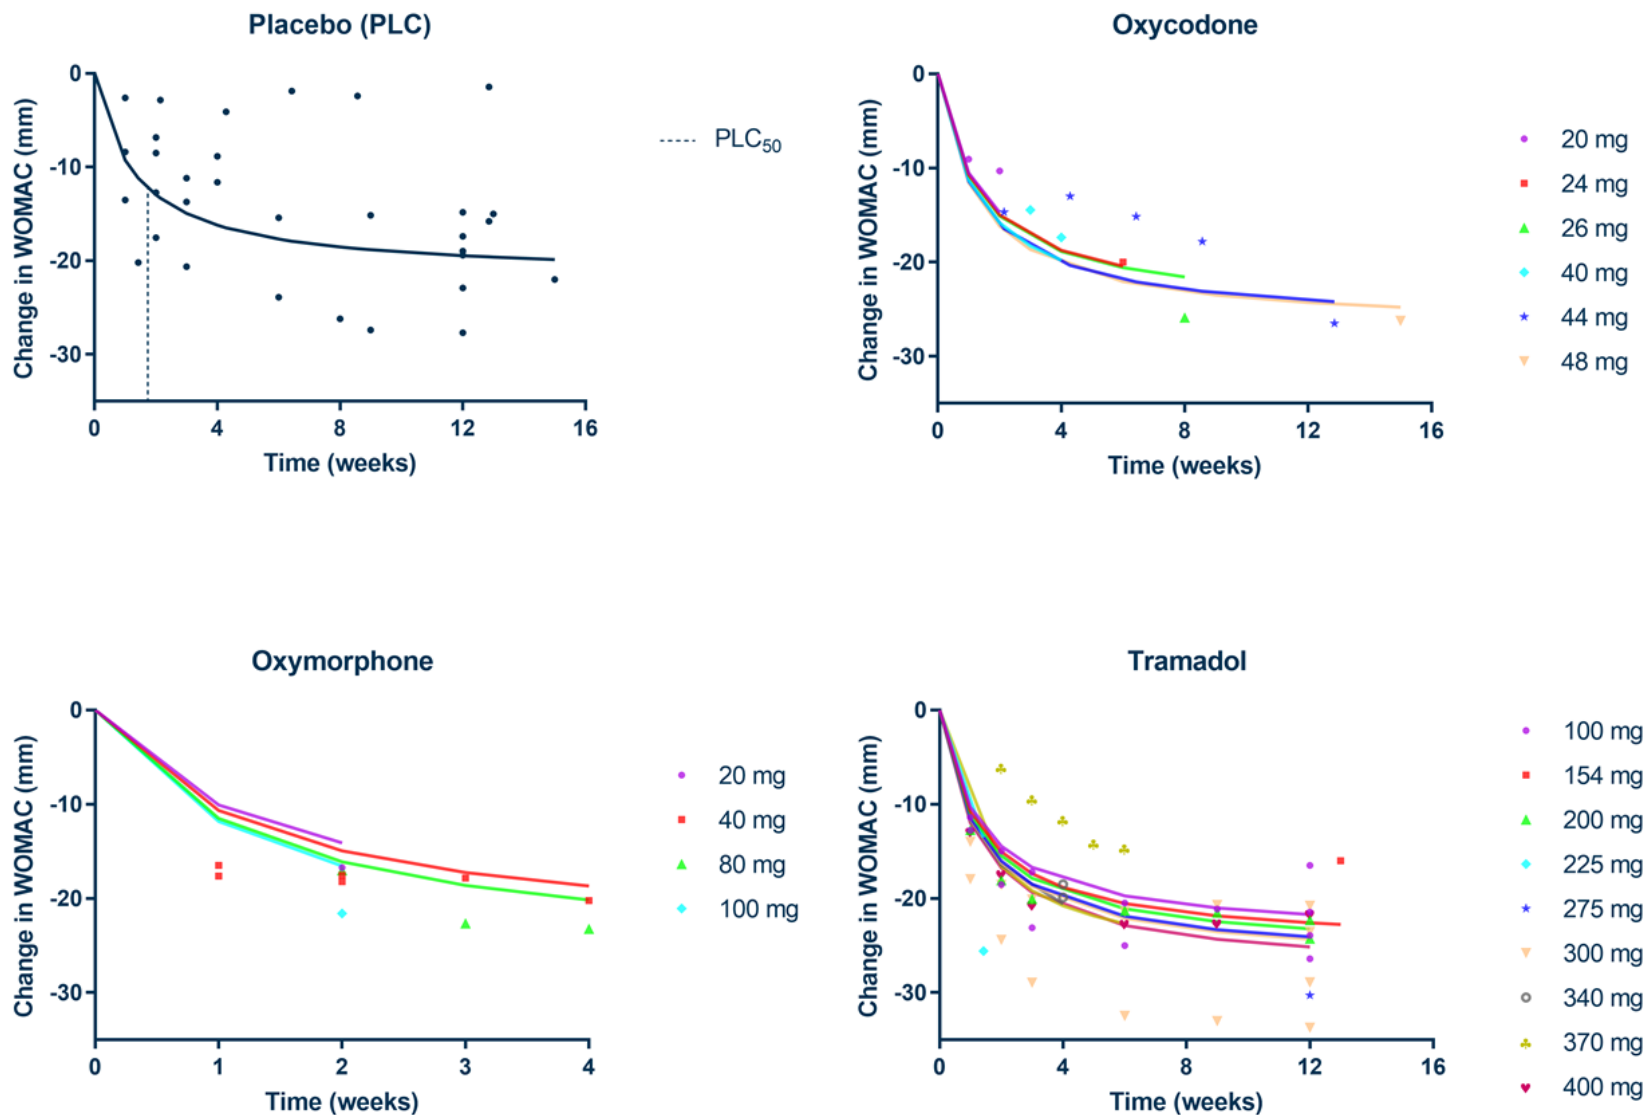

**Fig. S6** Incidence of the dropouts (DOs) associated with opioid compounds. The black circles represent the observed data whilst the best fitting analysis is represented by the solid line (curve). The percentage of DOs at daily dose = 0 represents the placebo arm in each study

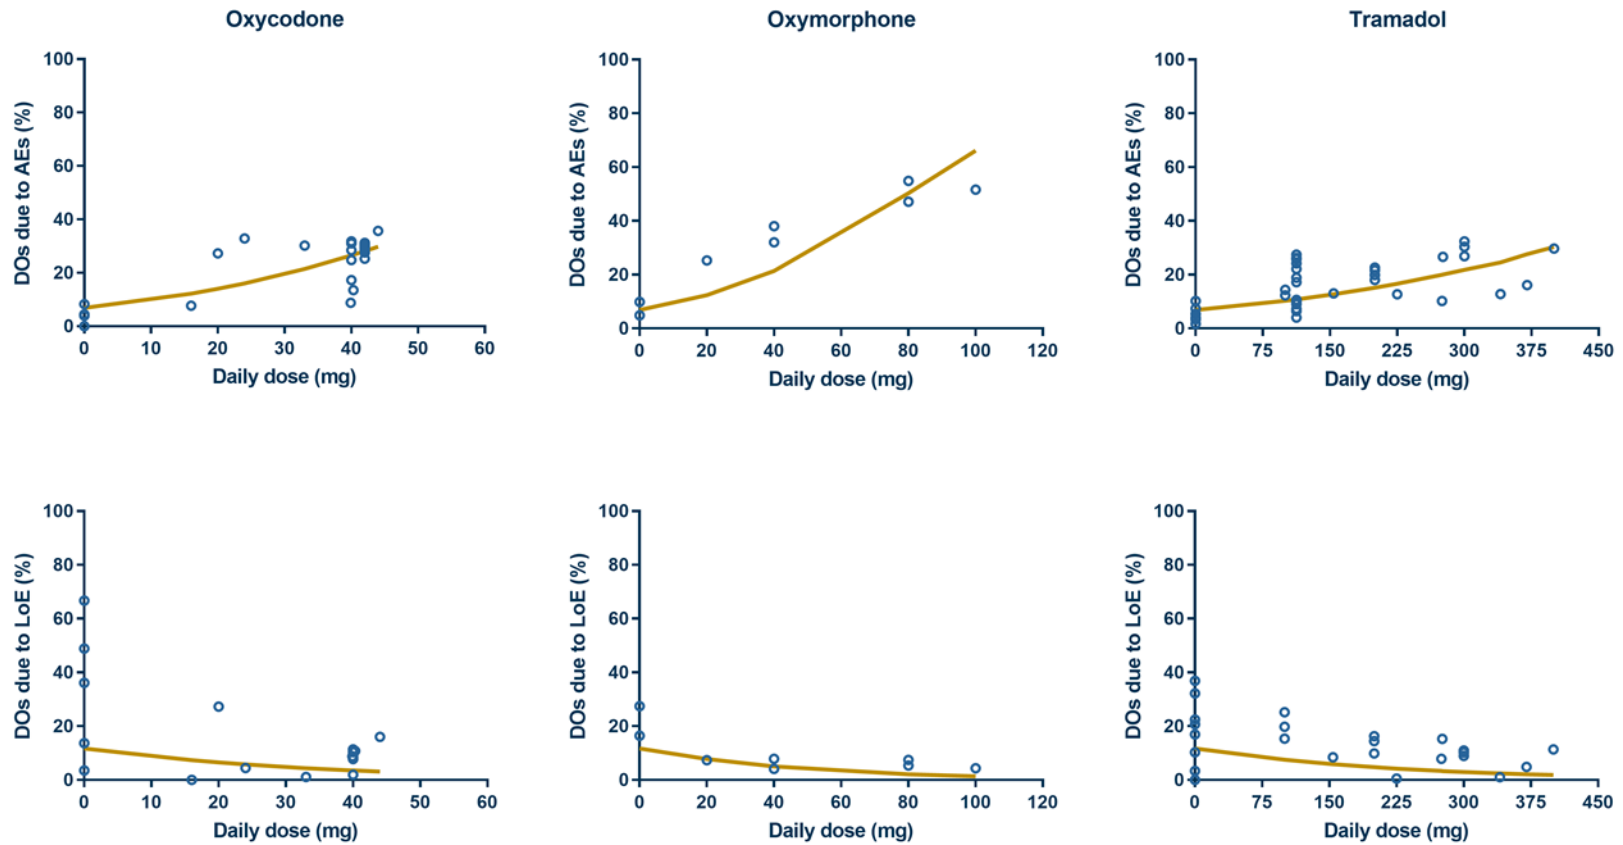

Supplement: NIHMS1846846-supplement-Supplementary_Material.pdf [file NIHMS1846846-supplement-Supplementary_Material.pdf]
